# Supplementary material
Source: PubMed Central journal article supplement (PMC4731871)
Supplement: NIHMS752423-supplement-supplement_1.pdf [file NIHMS752423-supplement-supplement_1.pdf]

## SUPPLEMENTAL MATERIAL

### Supplemental Table 1:

**Supplemental Table 1. Risk of Recurrence During the Blanking Period (<90 Days) According to Risk Allele Status**

| SNP        | Locus | Risk Allele | Combined      |          | VU            |          | HCL           |          | MGH           |          |
|------------|-------|-------------|---------------|----------|---------------|----------|---------------|----------|---------------|----------|
|            |       |             | OR            | <i>P</i> | OR            | <i>P</i> | OR            | <i>P</i> | OR            | <i>P</i> |
| rs13376333 | 1q21  | T           | 1.5 (1.2-2.0) | 0.002    | 1.5 (0.8-2.6) | 0.130    | 1.6 (1.2-2.2) | 0.004    | 1.0 (0.4-2.4) | 0.938    |
| rs2200733  | 4q25  | T           | 1.6 (1.2-2.1) | 0.000    | 2.0 (1.1-3.4) | 0.016    | 1.5 (1.1-2.1) | 0.007    | 1.1 (0.5-2.7) | 0.782    |
| rs10033464 | 4q25  | T           | 1.0 (0.8-1.4) | 0.815    | 0.8 (0.4-1.6) | 0.503    | 1.0 (0.7-1.5) | 0.793    | 1.6 (0.6-4.2) | 0.317    |
| rs7193343  | 16q22 | T           | 0.9 (0.7-1.2) | 0.696    | 1.2 (0.7-2.0) | 0.579    | 0.9 (0.6-1.2) | 0.323    | 1.3 (0.5-2.9) | 0.609    |

Recurrence includes AF, atrial flutter, or atrial tachycardia during the 3-month blanking period. 95% confidence intervals are presented in parentheses. Dominant genetic modeling is used for all SNPs. The reference genotype is CC for rs2200733, rs7193343, and rs13376333. The reference genotype is GG for rs10033464.

**Supplemental Table 2:**

**Supplemental Table 2. Univariate Analysis: Risk of Recurrence According to Risk Allele Status**

| SNP               | Locus | Risk Allele | Combined      |          | VU            |          | HCL           |          | MGH           |          |
|-------------------|-------|-------------|---------------|----------|---------------|----------|---------------|----------|---------------|----------|
|                   |       |             | HR            | <i>P</i> | HR            | <i>P</i> | HR            | <i>P</i> | HR            | <i>P</i> |
| <b>rs13376333</b> | 1q21  | T           | 1.1 (0.9-1.3) | 0.345    | 1.2 (0.8-1.7) | 0.384    | 1.1 (0.9-1.4) | 0.377    | 0.8 (0.4-1.5) | 0.419    |
| <b>rs2200733</b>  | 4q25  | T           | 1.2 (1.0-1.5) | 0.026    | 1.5 (1.0-2.2) | 0.027    | 1.1 (0.9-1.4) | 0.326    | 1.6 (0.8-3.1) | 0.216    |
| <b>rs10033464</b> | 4q25  | T           | 0.8 (0.7-1.0) | 0.114    | 0.7 (0.4-1.2) | 0.181    | 0.9 (0.7-1.1) | 0.314    | 0.7 (0.3-1.7) | 0.478    |
| <b>rs7193343</b>  | 16q22 | T           | 0.9 (0.7-1.1) | 0.285    | 1.3 (0.9-1.9) | 0.133    | 0.8 (0.6-1.0) | 0.056    | 0.7 (0.3-1.4) | 0.292    |

Recurrence includes AF, atrial flutter, or atrial tachycardia. Dominant genetic modeling is used for all SNPs. CC for rs2200733, rs7193343, and rs13376333. The reference genotype is GG for rs10033464.

### Supplemental Table 3

**Supplemental Table 3. Subgroup Analysis of Subjects with an Atrial Fibrillation Recurrence**

| SNP               | Locus | Risk Allele | VU            |          | HCL           |          | MGH           |          |
|-------------------|-------|-------------|---------------|----------|---------------|----------|---------------|----------|
|                   |       |             | Adj. HR       | <i>P</i> | Adj. OR       | <i>P</i> | Adj. HR       | <i>P</i> |
| <b>rs13376333</b> | 1q21  | T           | 1.4 (0.9-2.1) | 0.147    | 1.0 (0.6-1.5) | 0.860    | 0.8 (0.3-1.9) | 0.557    |
| <b>rs2200733</b>  | 4q25  | T           | 1.7 (1.1-2.7) | 0.015    | 1.3 (0.9-2.0) | 0.167    | 0.4 (0.1-1.2) | 0.111    |
| <b>rs10033464</b> | 4q25  | T           | 0.7 (0.4-1.2) | 0.189    | 1.3 (0.8-2.1) | 0.213    | 0.9 (0.3-2.6) | 0.794    |
| <b>rs7193343</b>  | 16q22 | T           | 1.2 (0.8-1.8) | 0.430    | 0.7 (0.5-1.2) | 0.195    | 0.7 (0.3-1.8) | 0.420    |

Subgroup analysis includes only patients with AF recurrence. Dominant genetic modeling is used for all SNPs. VU and HCL models are adjusted for age, gender, paroxysmal AF status, hypertension, BMI, LA diameter, and LVEF. The MGH model is adjusted for age and gender. The reference genotype is CC for rs2200733, rs7193343, and rs13376333. The reference genotype is GG for rs10033464.
